# Supplementary material for: Ligand directed debromination of tetrabromodiphenyl ether mediated by nickel under visible irradiation
Source: Royal Society of Chemistry journal article supplement (doi:10.1039/c9en00175a), 2019-01-01
Supplement: c9en00175a1.pdf [file c9en00175a1.pdf]

**Electronic Supplementary Information (ESI) for  
Environmental Science: Nano.**

**Ligand Directed Debromination of Tetrabromodiphenyl Ether  
Mediated by Nickel under Visible Irradiation**

Yan Wei,<sup>ab</sup> Yanjun Gong,<sup>ab</sup> Xin Zhao,<sup>ab</sup> Yuanyuan Wang,<sup>ab</sup> Ran Duan,<sup>a</sup> Chuncheng  
Chen,<sup>ab</sup> Wenjing Song<sup>\* ab</sup> and Jincai Zhao<sup>ab</sup>

*<sup>a</sup>Key Laboratory of Photochemistry, CAS Research/Education Center for Excellence  
in Molecular Sciences, Institute of Chemistry, Chinese Academy of Sciences, Beijing,  
100190, P. R. China*

*<sup>b</sup>University of Chinese Academy of Sciences, Beijing 100039, P. R. China*

Email address: [wsongunc@iccas.ac.cn](mailto:wsongunc@iccas.ac.cn)

## Product analysis

2,2',4,4'-tetrabromodiphenyl ether (BDE47) was analyzed by Agilent HPLC 1260 system with DAD detector and a DIKMA C-18 column (250×3mm). The mobile phase was 10% H<sub>2</sub>O and 90% CH<sub>3</sub>CN (v/v%) at 0.2 mL·min<sup>-1</sup>. The retention time of BDE47 was 28.16 min.

The debromination products of BDE47 were analyzed by Agilent GC7890 gas chromatograph with a DB-5 column (15 m×320 μm×0.25 μm) and an μ-ECD detector. The column temperature was held at 100 °C for 2 min. Then column temperature was increased to 230 °C at 15 °C·min<sup>-1</sup> and then to 270 °C at 5 °C·min<sup>-1</sup>. The temperature of injector was 300 °C, and the temperature of detector was 325 °C. The flow rate of argon carrier gas was 2.9 mL·min<sup>-1</sup>. The retention time of BDE47 was 11.423 min, the retention time of 2,4,4'-tribromodiphenyl ether (BDE28) was 9.988 min, the retention time of 2,2',4-tribromodiphenyl ether (BDE17) was 9.801 min, the retention time of 4,4'-dibromodiphenyl ether (BDE15) was 8.552 min, the retention time of 2,4'-dibromodiphenyl ether (BDE8) was 8.298 min, the retention time of 2,2'-bromodiphenyl ether (BDE4) or 2,4-bromodiphenyl ether (BDE7) was 8.128 min, the retention time of 4-bromodiphenyl ether (BDE3) was 6.47 min, and the retention time of 2-bromodiphenyl ether (BDE1) was 6.26 min.

Diphenyl ether (DE) was analyzed by an Agilent 7890 GC with an Agilent DB-VRX column (20 m×180 μm×1 μm) and a flame ionization detector (FID). The column temperature was held at 40 °C, keeping for 3 min. Then column temperature

was increased to 160 °C at 10 °C·min<sup>-1</sup> and kept at this temperature for 3 min. Then column temperature was increased to 200 °C at 10 °C·min<sup>-1</sup>. The temperature of injector was 200 °C, and the temperature of detector was 325 °C. The flow rate of the nitrogen carrier gas was 5 mL·min<sup>-1</sup>. The retention time of DE was 20.056 min.

4'-Bromoacetophenone was analyzed by an Agilent HPLC 1260 system with a Dikma Diamonsil C-18 column (250×2.1 mm, 3-μm film thickness). The mobile phase was 60% water and 40% acetonitrile (v/v%) at 0.2 mL·min<sup>-1</sup>.

The concentration of Br<sup>-</sup> was quantified by ion chromatography (DX-900) with an IonPac AS23 column. The eluent was 15 mM KOH aqueous solution at a flow rate of 0.7 mL·min<sup>-1</sup>.

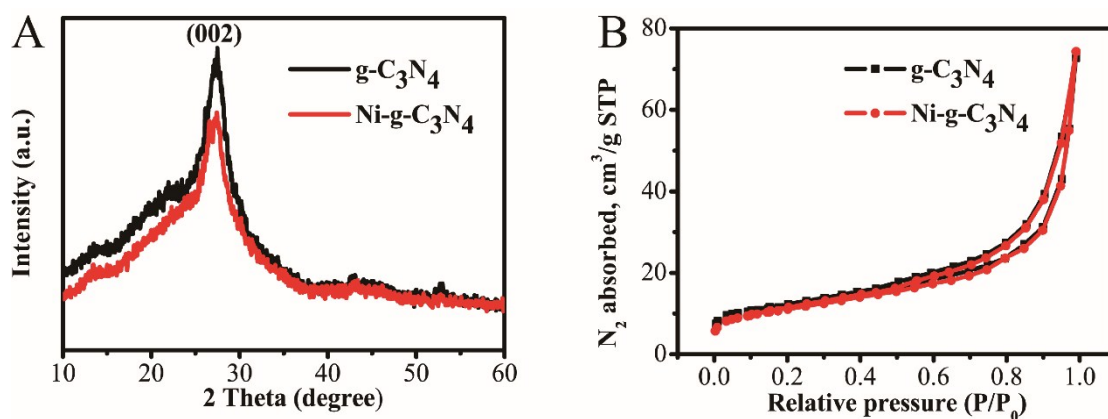

Fig. S1. (A) XRD patterns of g-C<sub>3</sub>N<sub>4</sub> and Ni-g-C<sub>3</sub>N<sub>4</sub>. (B) N<sub>2</sub> adsorption/desorption isotherms of g-C<sub>3</sub>N<sub>4</sub> and Ni-g-C<sub>3</sub>N<sub>4</sub>.

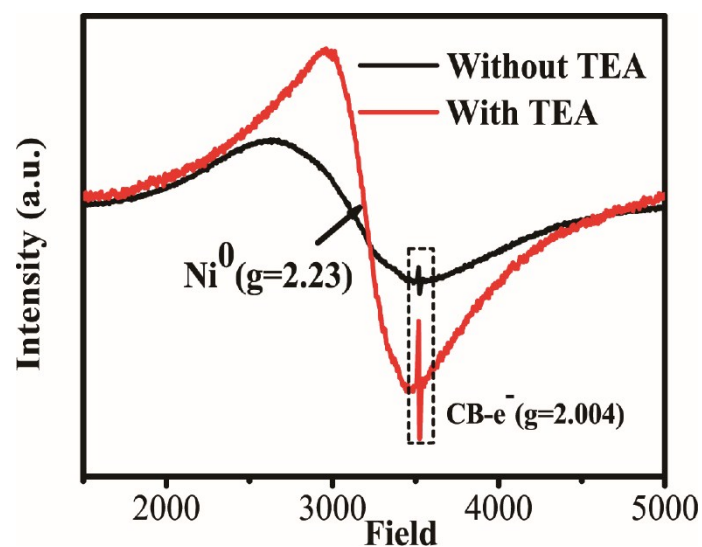

Fig. S2. Electron paramagnetic resonance (EPR) spectra of reaction suspension in methanol containing  $2 \text{ g} \cdot \text{L}^{-1}$   $\text{g-C}_3\text{N}_4$  with 2 wt.% of  $\text{NiCl}_2$  after 4 hours of irradiation in the absence or presence of trimethylamine (TEA).

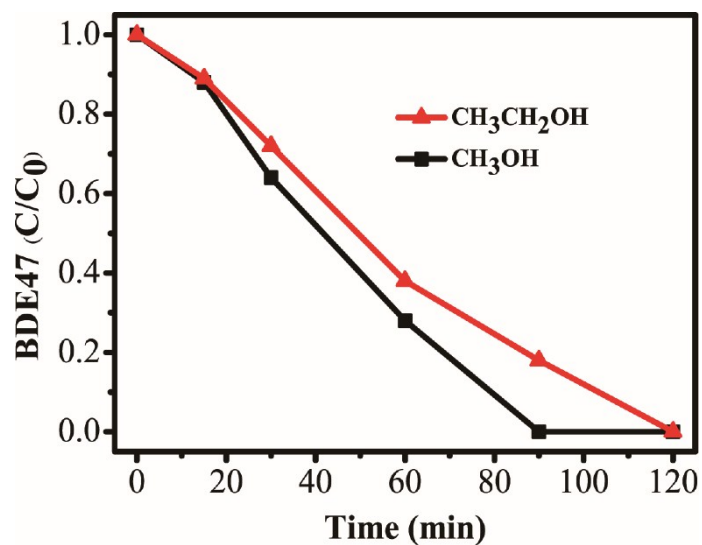

Fig. S3. Degradation of BDE47 catalyzed by *in-situ* formed Ni on  $\text{g-C}_3\text{N}_4$  in the mixture of methanol and TEA (v/v=19:1) or the mixture of ethanol and TEA (v/v=19:1).

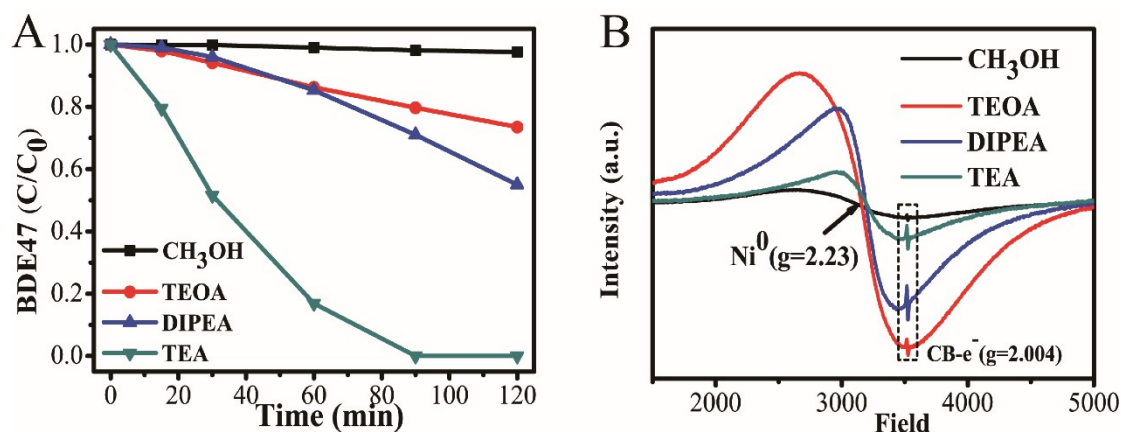

Fig. S4. (A) Degradation of BDE47 catalyzed by *in-situ* formed Ni on g-C<sub>3</sub>N<sub>4</sub> with different sacrificial reagents. (B) Electron paramagnetic resonance (EPR) spectra of reaction suspension in methanol containing 2 g·L<sup>-1</sup> g-C<sub>3</sub>N<sub>4</sub> with 2 wt.% of NiCl<sub>2</sub> after 4 hours of irradiation with different sacrificial reagents.

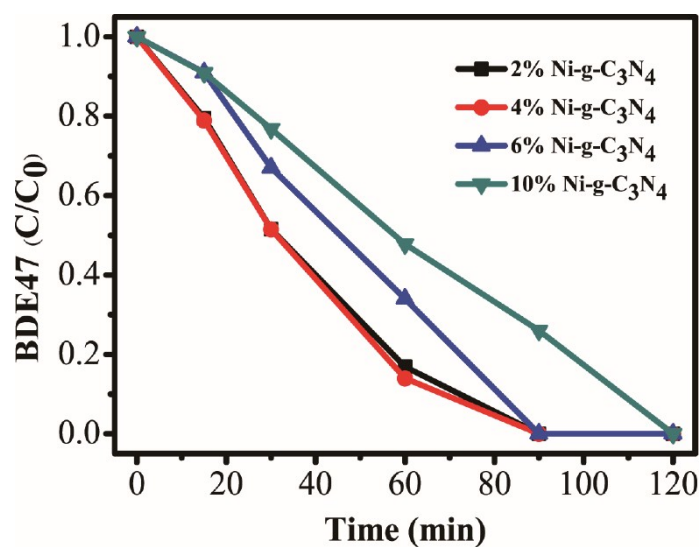

Fig. S5. Degradation of BDE47 in a suspension of g-C<sub>3</sub>N<sub>4</sub> with 2 to 10wt.% of NiCl<sub>2</sub>. Irradiation was provided by a 300 W Xe lamp with a 420 nm long pass filter. All experiments were conducted under Ar at 298K in a methanol/TEA mixture with 2 g·L<sup>-1</sup> catalyst.

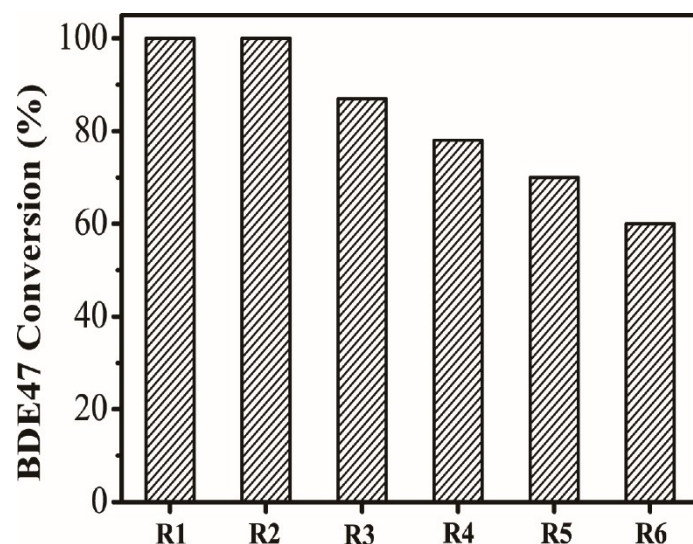

Fig. S6. Conversion of 10  $\mu$ M BDE47 at 2 hours in three consecutive reactions by adding fresh BDE47 stock solution.

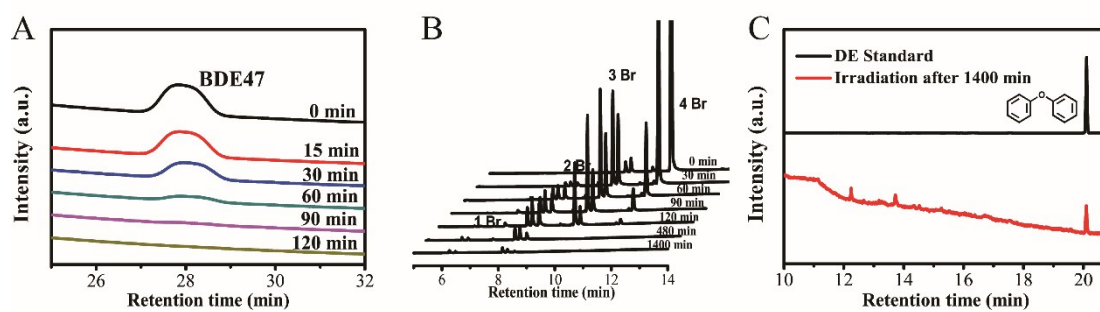

Fig. S7. (A) HPLC chromatograms of BDE47. (B) GC- $\mu$ ECD chromatograms of the debrominated products at various irradiation time. (C) Generation of DE detected by GC after 1400 min irradiation catalyzed by Ni-g-C<sub>3</sub>N<sub>4</sub>.

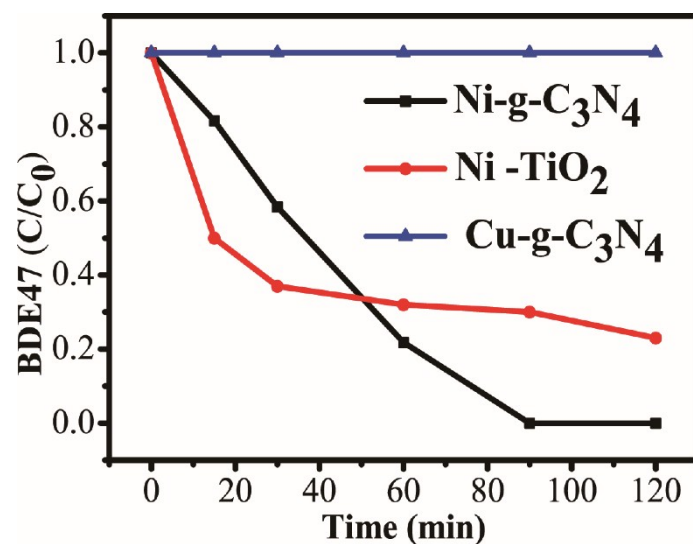

Fig. S8. Degradation of BDE47 catalyzed by Ni-g-C<sub>3</sub>N<sub>4</sub>, Cu-g-C<sub>3</sub>N<sub>4</sub> (> 420 nm irradiation), and Ni-TiO<sub>2</sub> (> 360 nm irradiation) in methanol/TEA mixture.

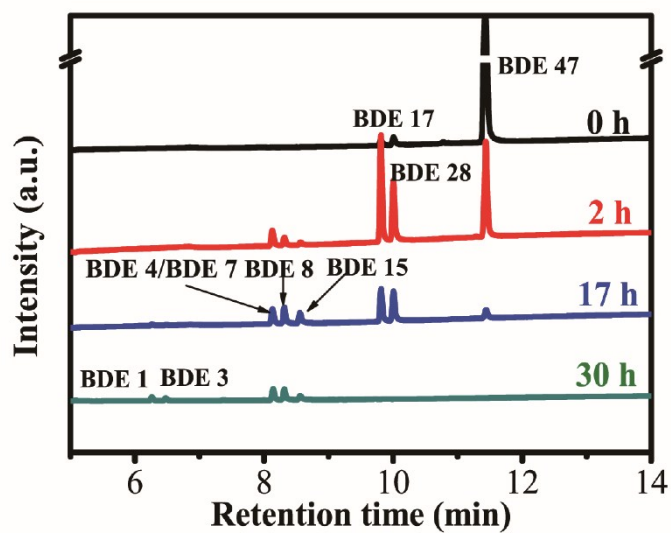

Fig. S9. GC-μECD chromatograms of the debrominated products of BDE47 catalyzed by Ni-TiO<sub>2</sub> at various irradiation time.

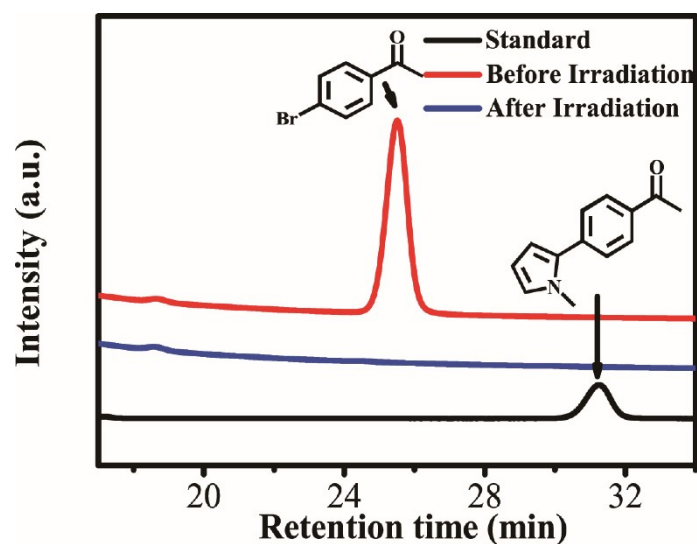

Fig. S10. HPLC chromatograms of product during debromination of 4'-bromoacetophenone with N-methylpyrrole as the aryl radical scavenger.

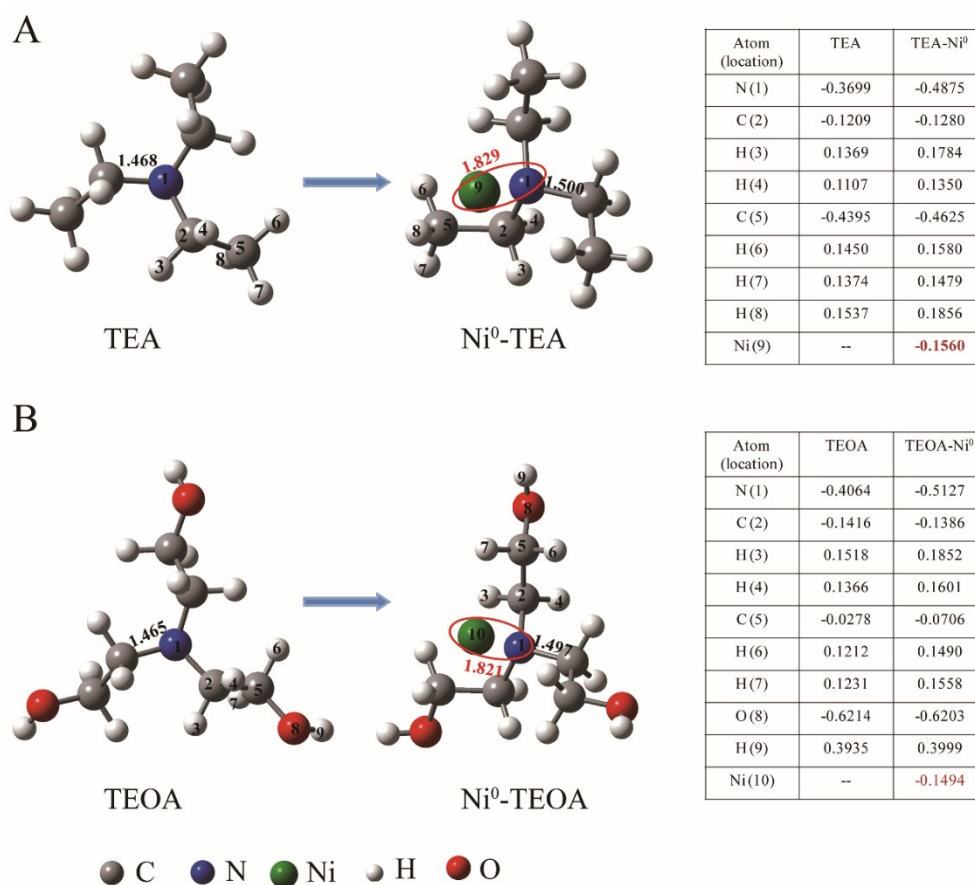

Fig. S11. Calculated charge distributions of TEA and TEOA with or without the coordinated Ni<sup>0</sup> atom. The distance between Ni and N and the C-N bond lengths was

S8



indicated in the modeled configurations. Charge distributions was calculated by B3LYP/6-31G(d), Gaussian 09 Program.<sup>1</sup>

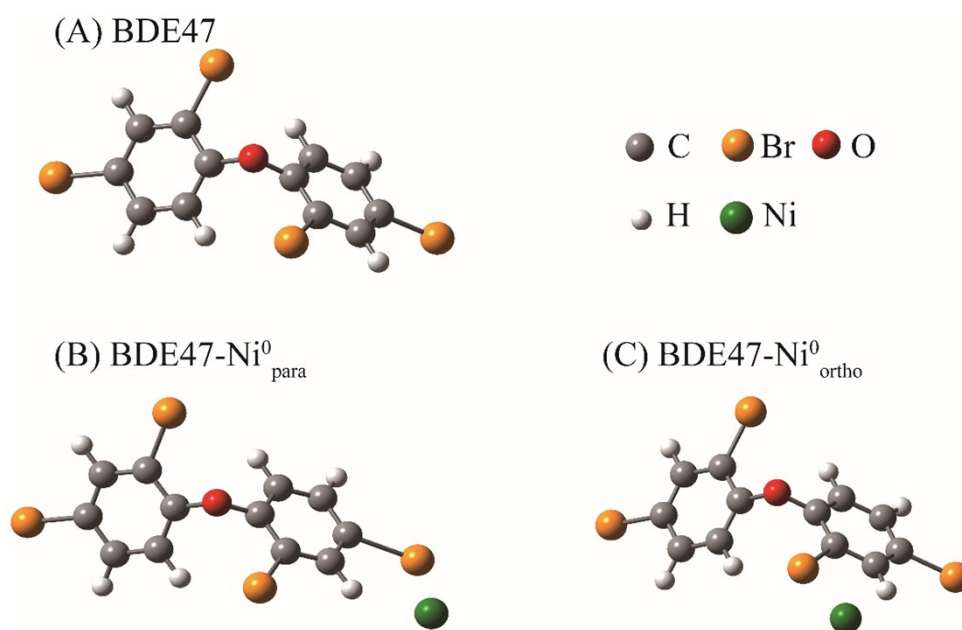

Fig. S12. Ball-and-stick models: (A) BDE47; Ni<sup>0</sup> next to (B) *para*-Br of BDE47 and (C) *ortho*-Br of BDE47.

Table S1. Concentration of Br<sup>-</sup> in debromination of BDE47 under different reaction conditions

| Irradiation          | Time (h) | C [Br <sup>-</sup> ] (M) |
|----------------------|----------|--------------------------|
| >420 nm              | 1.5      | $1.8 \times 10^{-5}$     |
| >420 nm              | 23       | $3.2 \times 10^{-5}$     |
| >360 nm <sup>a</sup> | 24       | $3.9 \times 10^{-5}$     |

Reaction conditions: CH<sub>3</sub>OH (19 mL), TEA (1 mL), BDE47 (10<sup>-5</sup> M), catalyst (40 mg), Ar, under visible-light irradiation (> 420 nm) or ultraviolet light irradiation (> 360 nm).

<sup>a</sup>Yield of diphenyl ether at 16 h was 50% but decreased to 42.5% after 24 h of

irradiation. There might be pathways (e.g., carbon oxygen bond cleavage<sup>2</sup>) for DE decomposition under UV irradiation.

Table S2. Hydrodebromination of selected substrates catalyzed by Ni-g-C<sub>3</sub>N<sub>4</sub>.

| Entry          | Substrate                                                                         | Product                                                                           | Time (h) | yield (%) |
|----------------|-----------------------------------------------------------------------------------|-----------------------------------------------------------------------------------|----------|-----------|
| 1 <sup>a</sup> | 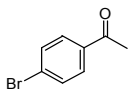 |  | 3        | 98%       |
| 2 <sup>b</sup> |  |  | 24       | 85%       |
| 3 <sup>a</sup> |  |  | 24       | 43%       |

Reaction conditions: CH<sub>3</sub>OH (19 mL), TEA (1 mL), substrates (<sup>a</sup>100 μM, <sup>b</sup>10 μM), catalyst (40 mg), Ar, under visible-light irradiation (> 420 nm, 300 mW·cm<sup>-2</sup>)

Table S3. Amount of consumed BDE47 and generated H<sub>2</sub> at different time during irradiation with (A) TEA or (B) TEOA as the electron/hydrogen donor.

(A)

| Time (min) | Conversion % | n1(BDE47) (μmol) | n2(H <sub>2</sub> ) (μmol) |
|------------|--------------|------------------|----------------------------|
| 0          | 0            | 0                | 0                          |
| 30         | 44.8         | 0.09             | 0.08                       |
| 60         | 84.5         | 0.17             | 0.20                       |
| 90         | 100          | 0.20             | 0.33                       |
| 120        | 100          | 0.20             | 0.42                       |

(B)

| Time (min) | Conversion % | n1(BDE47) (μmol) | n2(H <sub>2</sub> ) (μmol) |
|------------|--------------|------------------|----------------------------|
| 0          | 0            | 0                | 0                          |
| 30         | 5.62         | 0.01             | 0.36                       |
| 60         | 9.54         | 0.012            | 0.92                       |
| 90         | 13.5         | 0.02             | 1.42                       |
| 120        | 16.2         | 0.03             | 1.89                       |

Table S4. Bond lengths of C-Br bonds in BDE47 obtained by DFT calculation shown in Fig. S12.

| Adsorption state of BDE47            | Bond length (Å)        |                     |                       |                     |
|--------------------------------------|------------------------|---------------------|-----------------------|---------------------|
|                                      | <i>Ortho</i> -position |                     | <i>Para</i> -position |                     |
|                                      | C-Br <sub>2</sub>      | C-Br <sub>2</sub> ' | C-Br <sub>4</sub>     | C-Br <sub>4</sub> ' |
| Free                                 | 1.902                  | 1.902               | 1.908                 | 1.908               |
| Ni <sup>0</sup> -Br <sub>para</sub>  | 1.901                  | 1.902               | 1.990                 | 1.908               |
| Ni <sup>0</sup> -Br <sub>ortho</sub> | 1.989                  | 1.902               | 1.908                 | 1.908               |

## References

- (1) M. J. Frisch, G. W. Trucks, H. B. Schlegel, G. E. Scuseria, M. A. Robb. etc., Gaussian 09, Revision B.01, Gaussian, Inc.: Wallingford, CT, **2009**.
- (2) M. Guo, J. Peng, Q. Yang and C. Li, Highly active and selective RuPd bimetallic NPs for the cleavage of the diphenyl ether C–O bond, *ACS. Catal.*, 2018, **8**, 11174-11183.
